# Supplementary material for: Integrated transcriptome and metabolome analyses reveal the differentially expressed metabolites and genes involved in lipid in olive fruits
Source: PeerJ journal article supplement (doi:10.7717/peerj.18941), 2025-02-17
Supplement: Supplementary_Table_2.xls [file Supplementary_Table_2.xls]

## Sheet: Sheet1
Sample	Homogeneity test					ANOVA
	Levene Statistic	df1	df2	Sig.		Sum of Squares	df	Mean Square	F	Sig.
JZ	0.0495157	5	4344	0.998513	Between Groups	1.91031e-15	5	3.82063e-16	1.07326e-11	1
					Within Groups	0.154639	4344	3.55983e-05
					Total	0.154639	4349
KLD	0.04	5	4344	0.999	Between Groups	1.52337e-15	5	3.04675e-16	7.67507e-12	1
					Within Groups	0.172442	4344	3.96967e-05
					Total	0.172442	4349
